# Supplementary material for: The role of a water bug, Sigara striata, in freshwater food webs
Source: PeerJ. 2014 May 22;2:e389. doi: 10.7717/peerj.389 (PMC4034595; doi:10.7717/peerj.389)
Supplement: Supplemental Information [file peerj-02-389-s001.zip]

Archive with 12 entries (11 files):
- Klecka_Supplementary_Information/
- Klecka_Supplementary_Information/predator_species.bug
- Klecka_Supplementary_Information/traits_reduced.bug
- Klecka_Supplementary_Information/traits_mass.bug
- Klecka_Supplementary_Information/Klecka_script.r
- Klecka_Supplementary_Information/traits_full.bug
- Klecka_Supplementary_Information/prey.bug
- Klecka_Supplementary_Information/Sig.mort.mean.csv
- Klecka_Supplementary_Information/Sigara_traits.csv
- Klecka_Supplementary_Information/Sig.mort.full.csv
- Klecka_Supplementary_Information/Sig.prey.csv
- Klecka_Supplementary_Information/Supplementary_File_1.pdf
