# Supplementary material for: The role of a water bug, Sigara striata, in freshwater food webs
Source: PeerJ. 2014 May 22;2:e389. doi: 10.7717/peerj.389 (PMC4034595; doi:10.7717/peerj.389)
Supplement: Supplemental Information [file peerj-02-389-s001.zip › Klecka_Supplementary_Information/predator_species.bug]

# Estimate Sigara mortality inflicted by different species of predators (predator species as a random factor)

model{
# Likelihood	

	#random effect of predator species
	for(j in 1:13){
		b[j] ~ dnorm(0,precision)	
	}
	
	#N is the number of observations
	for(i in 1:N){
		consumed[i] ~ dbin(pi[i],n[i])
		logit(pi[i]) <- intercept + b[predator[i]] + z[i]
		z[i] ~ dnorm(0,precision2)
	}

        #priors

	intercept ~ dnorm(1,0.0001)
	precision ~ dgamma(0.01, 0.01)
	precision2 ~ dgamma(0.01, 0.01)

	#predicted mortality caused by the 13 predators
	for(k in 1:13){
		pred[k] <- exp(intercept + b[k])/(1+exp(intercept + b[k])) 
	}

	#calculate interspecific and intraspecific variation (standard deviation)
	SD_interspecific <- sqrt(1/precision)
	SD_intraspecific <- sqrt(1/precision2)
}      

                                              
