# Supplementary material for: The role of a water bug, Sigara striata, in freshwater food webs
Source: PeerJ. 2014 May 22;2:e389. doi: 10.7717/peerj.389 (PMC4034595; doi:10.7717/peerj.389)
Supplement: Supplemental Information [file peerj-02-389-s001.zip › Klecka_Supplementary_Information/prey.bug]

# Estimate mortality of different prey caused by Sigara

model{
# Likelihood	

	#prey is prey ID (1-6), Sig is presence/absence of Sigara (0/1)
	for(i in 1:N){
		consumed[i] ~ dbin(pi[i],n[i])
		logit(pi[i]) <- a[prey[i]] + b[prey[i]]*Sig[i] + z[i]
		z[i] ~ dnorm(0,precision)	
	}

        #priors
	for(j in 1:6){
		a[j] ~ dnorm(1,0.0001)
		b[j] ~ dnorm(1,0.0001)
	}

	precision ~ dgamma(0.01, 0.01)

	#predicted mortality of the 6 prey species in the absence of Sigara
	for(k in 1:6){
		pred_control[k] <- exp(a[k])/(1+exp(a[k])) 
	}

	#predicted mortality of the 6 prey species in the presence of Sigara	
	for(k in 1:6){
		pred_Sig[k] <- exp(a[k] + b[k])/(1+exp(a[k] + b[k])) 
	}
	

}      

                                              
