# Supplementary material for: The role of a water bug, Sigara striata, in freshwater food webs
Source: PeerJ. 2014 May 22;2:e389. doi: 10.7717/peerj.389 (PMC4034595; doi:10.7717/peerj.389)
Supplement: Supplemental Information [file peerj-02-389-s001.zip › Klecka_Supplementary_Information/Sig.mort.full.csv]

predator	pred id	date	Sigara initial	Sigara consumed	Sigara mortality	mass	foraging mode	microhabitat	feeding mode
aAcilius canaliculatus L3	1	6/2/2007	10	9	0.9	14.66	ambush	water collumn	suctorial
aAcilius canaliculatus L3	1	6/2/2007	10	9	0.9	14.66	ambush	water collumn	suctorial
aAcilius canaliculatus L3	1	6/11/2007	10	10	1	14.66	ambush	water collumn	suctorial
aAcilius canaliculatus L3	1	6/21/2007	10	10	1	14.66	ambush	water collumn	suctorial
bNotonecta glauca	2	5/23/2007	10	9	0.9	39.43	ambush	water collumn	suctorial
bNotonecta glauca	2	7/2/2007	10	10	1	39.43	ambush	water collumn	suctorial
bNotonecta glauca	2	7/2/2007	10	10	1	39.43	ambush	water collumn	suctorial
bNotonecta glauca	2	7/2/2007	10	9	0.9	39.43	ambush	water collumn	suctorial
bNotonecta glauca	2	7/2/2007	10	9	0.9	39.43	ambush	water collumn	suctorial
cAnax imperator	3	5/22/2007	10	7	0.7	267.00	ambush	water collumn	chewing
cAnax imperator	3	5/26/2007	10	8	0.8	267.00	ambush	water collumn	chewing
cAnax imperator	3	5/27/2007	10	7	0.7	267.00	ambush	water collumn	chewing
cAnax imperator	3	6/3/2007	10	9	0.9	267.00	ambush	water collumn	chewing
dDytiscus marginalis L3	4	6/3/2007	10	6	0.6	176.43	ambush	water collumn	suctorial
dDytiscus marginalis L3	4	6/25/2007	10	6	0.6	176.43	ambush	water collumn	suctorial
dDytiscus marginalis L3	4	6/25/2007	10	5	0.5	176.43	ambush	water collumn	suctorial
dDytiscus marginalis L3	4	6/3/2007	10	6	0.6	176.43	ambush	water collumn	suctorial
eLibellula depressa large	5	5/21/2007	10	5	0.5	58.41	ambush	bottom	chewing
eLibellula depressa large	5	5/21/2007	10	2	0.2	58.41	ambush	bottom	chewing
eLibellula depressa large	5	8/5/2007	10	4	0.4	58.41	ambush	bottom	chewing
eLibellula depressa large	5	8/5/2007	10	2	0.2	58.41	ambush	bottom	chewing
eLibellula depressa large	5	8/5/2007	10	4	0.4	58.41	ambush	bottom	chewing
fDytiscus marginalis imago	6	5/25/2007	10	2	0.2	528.43	searching	bottom	chewing
fDytiscus marginalis imago	6	5/26/2007	10	5	0.5	528.43	searching	bottom	chewing
fDytiscus marginalis imago	6	5/27/2007	10	1	0.1	528.43	searching	bottom	chewing
fDytiscus marginalis imago	6	5/28/2007	10	4	0.4	528.43	searching	bottom	chewing
gAcilius canaliculatus imago	7	5/22/2007	10	6	0.6	61.74	searching	bottom	chewing
gAcilius canaliculatus imago	7	5/22/2007	10	1	0.1	61.74	searching	bottom	chewing
gAcilius canaliculatus imago	7	6/22/2007	10	0	0	61.74	searching	bottom	chewing
gAcilius canaliculatus imago	7	6/22/2007	10	5	0.5	61.74	searching	bottom	chewing
hLibellula depressa small	8	8/5/2007	10	2	0.2	20.94	ambush	bottom	chewing
hLibellula depressa small	8	8/5/2007	10	3	0.3	20.94	ambush	bottom	chewing
hLibellula depressa small	8	8/5/2007	10	2	0.2	20.94	ambush	bottom	chewing
hLibellula depressa small	8	8/15/2007	10	2	0.2	20.94	ambush	bottom	chewing
iSympetrum sp.	9	6/2/2007	10	2	0.2	20.82	ambush	water collumn	chewing
iSympetrum sp.	9	6/2/2007	10	1	0.1	20.82	ambush	water collumn	chewing
iSympetrum sp.	9	6/2/2007	10	2	0.2	20.82	ambush	water collumn	chewing
iSympetrum sp.	9	6/2/2007	10	1	0.1	20.82	ambush	water collumn	chewing
jAcilius canaliculatus L2	10	6/21/2007	10	0	0	2.74	ambush	water collumn	suctorial
jAcilius canaliculatus L2	10	6/22/2007	10	3	0.3	2.74	ambush	water collumn	suctorial
jAcilius canaliculatus L2	10	6/22/2007	10	2	0.2	2.74	ambush	water collumn	suctorial
jAcilius canaliculatus L2	10	6/22/2007	10	1	0.1	2.74	ambush	water collumn	suctorial
kHydaticus seminiger imago	11	7/1/2007	10	1	0.1	64.94	searching	bottom	chewing
kHydaticus seminiger imago	11	7/1/2007	10	0	0	64.94	searching	bottom	chewing
kHydaticus seminiger imago	11	7/1/2007	10	1	0.1	64.94	searching	bottom	chewing
kHydaticus seminiger imago	11	7/1/2007	10	0	0	64.94	searching	bottom	chewing
lIlyocoris cimicoides	12	8/6/2007	10	0	0	34.43	searching	bottom	suctorial
lIlyocoris cimicoides	12	8/6/2007	10	1	0.1	34.43	searching	bottom	suctorial
lIlyocoris cimicoides	12	8/6/2007	10	1	0.1	34.43	searching	bottom	suctorial
lIlyocoris cimicoides	12	8/6/2007	10	0	0	34.43	searching	bottom	suctorial
mCoenagrion puella	13	5/20/2007	10	0	0	4.80	ambush	water collumn	chewing
mCoenagrion puella	13	5/20/2007	10	0	0	4.80	ambush	water collumn	chewing
mCoenagrion puella	13	5/15/2007	10	0	0	4.80	ambush	water collumn	chewing
mCoenagrion puella	13	5/15/2007	10	0	0	4.80	ambush	water collumn	chewing
