# Supplementary material for: The role of a water bug, Sigara striata, in freshwater food webs
Source: PeerJ. 2014 May 22;2:e389. doi: 10.7717/peerj.389 (PMC4034595; doi:10.7717/peerj.389)
Supplement: Supplemental Information [file peerj-02-389-s001.zip › Klecka_Supplementary_Information/Sig.mort.mean.csv]

predator	initial	consumed mean	mortality mean	weight_(number of trials*number of prey)	weight (mg)	foraging mode	microhabitat	feeding mode
gAcilius canaliculatus imago	10	3	0.3	40	61.74	searching	bottom	chewing
jAcilius canaliculatus L2	10	1.5	0.15	40	2.74	ambush	water collumn	suctorial
aAcilius canaliculatus L3	10	9.5	0.95	40	14.66	ambush	water collumn	suctorial
cAnax imperator	10	7.75	0.775	40	267.00	ambush	water collumn	chewing
mCoenagrion puella	10	0	0	40	4.80	ambush	water collumn	chewing
fDytiscus marginalis imago	10	3	0.3	40	528.43	searching	bottom	chewing
dDytiscus marginalis L3	10	5.75	0.575	40	176.43	ambush	water collumn	suctorial
kHydaticus seminiger imago	10	0.5	0.05	40	64.94	searching	bottom	chewing
lIlyocoris cimicoides	10	0.5	0.05	40	34.43	searching	bottom	suctorial
eLibellula depressa large	10	3.4	0.34	50	58.41	ambush	bottom	chewing
hLibellula depressa small	10	2.25	0.225	40	20.94	ambush	bottom	chewing
bNotonecta glauca	10	9.4	0.94	50	39.43	ambush	water collumn	suctorial
iSympetrum sp.	10	1.5	0.15	40	20.82	ambush	water collumn	chewing
