# Supplementary material for: The role of a water bug, Sigara striata, in freshwater food webs
Source: PeerJ. 2014 May 22;2:e389. doi: 10.7717/peerj.389 (PMC4034595; doi:10.7717/peerj.389)
Supplement: Supplemental Information [file peerj-02-389-s001.zip › Klecka_Supplementary_Information/Sig.prey.csv]

experiment.id	date	Sigara.presence	prey	prey.id	prey.initial	prey.consumed
1	5/1/2007	0	Lymnaea	1	6	0
1	5/1/2007	0	Asellus	2	10	0
1	5/1/2007	0	Culex	3	10	0
1	5/1/2007	0	Chironomus	4	10	0
1	5/1/2007	0	Cleon	5	10	1
1	5/1/2007	0	Daphnia	6	30	0
2	5/1/2007	0	Lymnaea	1	6	0
2	5/1/2007	0	Asellus	2	10	0
2	5/1/2007	0	Culex	3	10	1
2	5/1/2007	0	Chironomus	4	10	1
2	5/1/2007	0	Cleon	5	10	1
2	5/1/2007	0	Daphnia	6	30	2
3	5/1/2007	1	Lymnaea	1	6	0
3	5/1/2007	1	Asellus	2	10	0
3	5/1/2007	1	Culex	3	10	1
3	5/1/2007	1	Chironomus	4	10	10
3	5/1/2007	1	Cleon	5	10	0
3	5/1/2007	1	Daphnia	6	30	1
4	5/1/2007	1	Lymnaea	1	6	0
4	5/1/2007	1	Asellus	2	10	0
4	5/1/2007	1	Culex	3	10	1
4	5/1/2007	1	Chironomus	4	10	9
4	5/1/2007	1	Cleon	5	10	1
4	5/1/2007	1	Daphnia	6	30	0
5	5/15/2007	0	Lymnaea	1	6	0
5	5/15/2007	0	Asellus	2	10	0
5	5/15/2007	0	Culex	3	10	0
5	5/15/2007	0	Chironomus	4	10	2
5	5/15/2007	0	Cleon	5	10	0
5	5/15/2007	0	Daphnia	6	30	3
6	5/15/2007	0	Lymnaea	1	6	0
6	5/15/2007	0	Asellus	2	10	0
6	5/15/2007	0	Culex	3	10	1
6	5/15/2007	0	Chironomus	4	10	1
6	5/15/2007	0	Cleon	5	10	0
6	5/15/2007	0	Daphnia	6	30	2
7	5/15/2007	1	Lymnaea	1	6	0
7	5/15/2007	1	Asellus	2	10	0
7	5/15/2007	1	Culex	3	10	0
7	5/15/2007	1	Chironomus	4	10	10
7	5/15/2007	1	Cleon	5	10	0
7	5/15/2007	1	Daphnia	6	30	3
8	5/15/2007	1	Lymnaea	1	6	0
8	5/15/2007	1	Asellus	2	10	0
8	5/15/2007	1	Culex	3	10	1
8	5/15/2007	1	Chironomus	4	10	10
8	5/15/2007	1	Cleon	5	10	0
8	5/15/2007	1	Daphnia	6	30	2
9	5/18/2007	0	Lymnaea	1	6	0
9	5/18/2007	0	Asellus	2	10	0
9	5/18/2007	0	Culex	3	10	0
9	5/18/2007	0	Chironomus	4	10	0
9	5/18/2007	0	Cleon	5	10	0
9	5/18/2007	0	Daphnia	6	30	1
10	5/18/2007	0	Lymnaea	1	6	0
10	5/18/2007	0	Asellus	2	10	0
10	5/18/2007	0	Culex	3	10	0
10	5/18/2007	0	Chironomus	4	10	3
10	5/18/2007	0	Cleon	5	10	0
10	5/18/2007	0	Daphnia	6	30	3
11	5/18/2007	1	Lymnaea	1	6	0
11	5/18/2007	1	Asellus	2	10	0
11	5/18/2007	1	Culex	3	10	0
11	5/18/2007	1	Chironomus	4	10	10
11	5/18/2007	1	Cleon	5	10	0
11	5/18/2007	1	Daphnia	6	30	2
12	5/19/2007	1	Lymnaea	1	6	0
12	5/19/2007	1	Asellus	2	10	0
12	5/19/2007	1	Culex	3	10	0
12	5/19/2007	1	Chironomus	4	10	10
12	5/19/2007	1	Cleon	5	10	0
12	5/19/2007	1	Daphnia	6	30	1
