# Supplementary material for: The role of a water bug, Sigara striata, in freshwater food webs
Source: PeerJ. 2014 May 22;2:e389. doi: 10.7717/peerj.389 (PMC4034595; doi:10.7717/peerj.389)
Supplement: Supplemental Information [file peerj-02-389-s001.zip › Klecka_Supplementary_Information/traits_reduced.bug]

# Estimate Sigara mortality depending on predator traits (reduced model)

model{
# Likelihood	

# centered predator body mass
m <- log(mass)-mean(log(mass))
	
	#random effect of predator species
	for(j in 1:13){
		b[j] ~ dnorm(0,precision)	
	}
	
	#N is the number of observations
	for(i in 1:N){
		consumed[i] ~ dbin(pi[i],n[i])
		logit(pi[i]) <- intercept + a1*m[i] + a2*((m[i])^2) + a3*ambush[i] + a4*suctorial[i] + a5*pelagic[i] + b[predator[i]] + z[i]
		z[i] ~ dnorm(0,precision2)
	}

        #priors

	intercept ~ dnorm(1,0.0001)

	a1 ~ dnorm(0,0.0001)
	a2 <- 0
	a3 ~ dnorm(0,0.0001)
	a4 ~ dnorm(0,0.0001)
	a5 <- 0

	precision ~ dgamma(0.01, 0.01)
	precision2 ~ dgamma(0.01, 0.01)

	#calculate interspecific and intraspecific variation (standard deviation)
	SD_interspecific <- sqrt(1/precision)
	SD_intraspecific <- sqrt(1/precision2)
}  
